# Supplementary material for: Accuracy improvement of laser-induced breakdown spectroscopy coal analysis by hybrid transfer learning
Source: Royal Society of Chemistry journal article supplement (doi:10.1039/d3ay01380d), 2023-01-01
Supplement: d3ay01380d1.pdf [file d3ay01380d1.pdf]

S.1 Average R<sup>2</sup>P of the compared methods in the analysis of ash content

| Target domain training set size | R <sup>2</sup> P of direct modeling | R <sup>2</sup> P of fine-tuning of source domain model | R <sup>2</sup> P of fine-tuning of cross-domain model | R <sup>2</sup> P of HTr-LIBS |
|---------------------------------|-------------------------------------|--------------------------------------------------------|-------------------------------------------------------|------------------------------|
| 2                               | -1.0406                             | -0.5346                                                | -0.5314                                               | 0.6450                       |
| 3                               | -0.6993                             | 0.2126                                                 | 0.2401                                                | 0.5995                       |
| 4                               | -0.1881                             | 0.2602                                                 | 0.3117                                                | 0.4699                       |
| 5                               | 0.2703                              | 0.3238                                                 | 0.4723                                                | 0.5849                       |
| 6                               | 0.3543                              | 0.2360                                                 | 0.5092                                                | 0.6012                       |
| 7                               | 0.4906                              | 0.5142                                                 | 0.5906                                                | 0.7580                       |
| 8                               | 0.5335                              | 0.3419                                                 | 0.6468                                                | 0.7956                       |
| 9                               | 0.5685                              | 0.7083                                                 | 0.6907                                                | 0.8222                       |
| 10                              | 0.6805                              | 0.7144                                                 | 0.7759                                                | 0.7955                       |
| 11                              | 0.7250                              | 0.7178                                                 | 0.6938                                                | 0.8439                       |
| 12                              | 0.7556                              | 0.7949                                                 | 0.7248                                                | 0.8593                       |
| 13                              | 0.7561                              | 0.7609                                                 | 0.7701                                                | 0.8571                       |
| 14                              | 0.7680                              | 0.7237                                                 | 0.8308                                                | 0.8625                       |
| 15                              | 0.7394                              | 0.8698                                                 | 0.8491                                                | 0.8720                       |
| 16                              | 0.7644                              | 0.7970                                                 | 0.8504                                                | 0.8525                       |
| 17                              | 0.7777                              | 0.7947                                                 | 0.8048                                                | 0.8870                       |
| 18                              | 0.7766                              | 0.7590                                                 | 0.8097                                                | 0.8762                       |
| 19                              | 0.8105                              | 0.8361                                                 | 0.8227                                                | 0.9029                       |

S.2 Average RMSEP of the compared methods in the analysis of ash content

| Target domain training set size | RMSEP of direct modeling (wt.%) | RMSEP of fine-tuning of source domain model (wt.%) | RMSEP of fine-tuning of cross-domain model (wt.%) | RMSEP of HTr-LIBS (wt.%) |
|---------------------------------|---------------------------------|----------------------------------------------------|---------------------------------------------------|--------------------------|
| 2                               | 9.1765                          | 7.7218                                             | 8.1149                                            | 3.9094                   |
| 3                               | 8.4603                          | 5.8365                                             | 5.6909                                            | 4.0782                   |
| 4                               | 7.1709                          | 5.5987                                             | 5.4597                                            | 4.7944                   |
| 5                               | 5.5924                          | 5.3291                                             | 4.7112                                            | 4.1170                   |
| 6                               | 5.2548                          | 5.7426                                             | 4.6106                                            | 4.1462                   |
| 7                               | 4.6028                          | 4.4764                                             | 4.2132                                            | 3.2492                   |
| 8                               | 4.3749                          | 5.1085                                             | 3.9208                                            | 2.9784                   |
| 9                               | 4.1930                          | 3.4245                                             | 3.6421                                            | 2.7642                   |
| 10                              | 3.7070                          | 3.5285                                             | 3.1227                                            | 2.9720                   |
| 11                              | 3.4536                          | 3.4489                                             | 3.6570                                            | 2.6096                   |
| 12                              | 3.2630                          | 2.9610                                             | 3.4204                                            | 2.4765                   |
| 13                              | 3.2612                          | 3.0194                                             | 3.1577                                            | 2.5045                   |
| 14                              | 3.1711                          | 3.3879                                             | 2.7167                                            | 2.4415                   |
| 15                              | 3.3464                          | 2.2737                                             | 2.5653                                            | 2.3706                   |

|    |        |        |        |        |
|----|--------|--------|--------|--------|
| 16 | 3.1918 | 2.9129 | 2.5392 | 2.5261 |
| 17 | 3.0935 | 2.8530 | 2.8990 | 2.2191 |
| 18 | 3.1042 | 2.6633 | 2.8701 | 2.3136 |
| 19 | 2.8823 | 2.5699 | 2.7878 | 2.0588 |

### S.3 Average MAEP of the compared methods in the analysis of ash content

| Target domain training set size | MAEP of direct modeling (wt.%) | MAEP of fine-tuning of source domain model (wt.%) | MAEP of fine-tuning of cross-domain model (wt.%) | MAEP of HTr-LIBS (wt.%) |
|---------------------------------|--------------------------------|---------------------------------------------------|--------------------------------------------------|-------------------------|
| 2                               | 7.1262                         | 6.3819                                            | 6.6945                                           | 3.2366                  |
| 3                               | 6.8122                         | 4.8225                                            | 4.4820                                           | 3.2557                  |
| 4                               | 5.5418                         | 4.3279                                            | 4.3084                                           | 3.9851                  |
| 5                               | 4.1034                         | 3.9701                                            | 3.5671                                           | 3.1373                  |
| 6                               | 3.6860                         | 3.8449                                            | 3.6773                                           | 3.0934                  |
| 7                               | 3.5846                         | 3.5535                                            | 3.0831                                           | 2.5560                  |
| 8                               | 3.3893                         | 3.8162                                            | 3.0223                                           | 2.3265                  |
| 9                               | 3.1556                         | 2.5595                                            | 2.6623                                           | 2.1994                  |
| 10                              | 2.8718                         | 2.5891                                            | 2.3797                                           | 2.4459                  |
| 11                              | 2.7145                         | 2.3292                                            | 2.6909                                           | 1.9977                  |
| 12                              | 2.5171                         | 1.9388                                            | 2.2813                                           | 1.9283                  |
| 13                              | 2.5393                         | 2.4212                                            | 2.1309                                           | 1.9815                  |
| 14                              | 2.4836                         | 1.8752                                            | 2.0485                                           | 1.9237                  |
| 15                              | 2.5502                         | 1.3290                                            | 1.9010                                           | 1.8166                  |
| 16                              | 2.4393                         | 1.5107                                            | 1.8652                                           | 1.9356                  |
| 17                              | 2.3339                         | 1.5312                                            | 1.9999                                           | 1.6588                  |
| 18                              | 2.3253                         | 1.9825                                            | 1.9536                                           | 1.7140                  |
| 19                              | 2.1387                         | 1.7117                                            | 1.8687                                           | 1.6055                  |

### S.4 Average R<sup>2</sup>P of the compared methods in the analysis of volatile matter content

| Target domain training set size | R <sup>2</sup> P of direct modeling | R <sup>2</sup> P of fine-tuning of source domain model | R <sup>2</sup> P of fine-tuning of cross-domain model | R <sup>2</sup> P of HTr-LIBS |
|---------------------------------|-------------------------------------|--------------------------------------------------------|-------------------------------------------------------|------------------------------|
| 2                               | -1.9798                             | -0.5504                                                | -0.1010                                               | 0.4454                       |
| 3                               | -0.2440                             | -0.1177                                                | 0.2780                                                | 0.4921                       |
| 4                               | -0.2963                             | 0.2520                                                 | 0.3641                                                | 0.6127                       |
| 5                               | 0.0965                              | 0.2957                                                 | 0.6170                                                | 0.7050                       |
| 6                               | 0.2796                              | 0.6384                                                 | 0.7313                                                | 0.7791                       |
| 7                               | 0.6098                              | 0.2228                                                 | 0.7870                                                | 0.8137                       |
| 8                               | 0.6364                              | 0.5065                                                 | 0.8161                                                | 0.8225                       |
| 9                               | 0.7537                              | 0.5858                                                 | 0.8695                                                | 0.8757                       |
| 10                              | 0.5891                              | 0.4567                                                 | 0.7710                                                | 0.8014                       |

|    |        |        |        |        |
|----|--------|--------|--------|--------|
| 11 | 0.7348 | 0.3718 | 0.7999 | 0.8011 |
| 12 | 0.7046 | 0.5628 | 0.8226 | 0.8376 |
| 13 | 0.7557 | 0.3514 | 0.8042 | 0.8750 |
| 14 | 0.8390 | 0.5529 | 0.8111 | 0.8447 |
| 15 | 0.8613 | 0.7669 | 0.8206 | 0.8901 |
| 16 | 0.8939 | 0.6762 | 0.8991 | 0.9140 |
| 17 | 0.9330 | 0.8287 | 0.9221 | 0.9342 |
| 18 | 0.9378 | 0.9325 | 0.9470 | 0.9489 |
| 19 | 0.9440 | 0.9309 | 0.9497 | 0.9627 |

S.5 Average RMSEP of the compared methods in the analysis of volatile matter content

| Target domain training set size | RMSEP of direct modeling (wt.%) | RMSEP of fine-tuning of source domain model (wt.%) | RMSEP of fine-tuning of cross-domain model (wt.%) | RMSEP of HTr-LIBS (wt.%) |
|---------------------------------|---------------------------------|----------------------------------------------------|---------------------------------------------------|--------------------------|
| 2                               | 14.1647                         | 10.0288                                            | 8.4446                                            | 6.0974                   |
| 3                               | 8.9981                          | 8.6316                                             | 6.6631                                            | 5.8097                   |
| 4                               | 8.9547                          | 7.0847                                             | 6.3375                                            | 5.1080                   |
| 5                               | 7.5011                          | 6.7883                                             | 4.6972                                            | 4.3787                   |
| 6                               | 6.6596                          | 4.9482                                             | 4.2836                                            | 3.7686                   |
| 7                               | 5.1551                          | 7.3418                                             | 3.7763                                            | 3.6052                   |
| 8                               | 4.7533                          | 5.6642                                             | 3.4292                                            | 3.4388                   |
| 9                               | 4.0456                          | 5.1968                                             | 2.9645                                            | 2.8875                   |
| 10                              | 5.2414                          | 5.9353                                             | 3.8139                                            | 3.5264                   |
| 11                              | 4.2394                          | 6.4220                                             | 3.5847                                            | 3.6114                   |
| 12                              | 4.4348                          | 5.4075                                             | 3.4194                                            | 3.2723                   |
| 13                              | 3.9880                          | 6.5464                                             | 3.5958                                            | 2.7841                   |
| 14                              | 3.2434                          | 5.2784                                             | 3.5221                                            | 3.1652                   |
| 15                              | 3.0194                          | 3.7133                                             | 3.3031                                            | 2.6488                   |
| 16                              | 2.6758                          | 4.5032                                             | 2.6180                                            | 2.3533                   |
| 17                              | 2.1593                          | 3.4454                                             | 2.2921                                            | 2.0878                   |
| 18                              | 2.0845                          | 1.9525                                             | 1.8879                                            | 1.8822                   |
| 19                              | 1.9764                          | 2.1149                                             | 1.8693                                            | 1.6083                   |

S.6 Average MAEP of the compared methods in the analysis of volatile matter content

| Target domain training set size | MAEP of direct modeling (wt.%) | MAEP of fine-tuning of source domain model (wt.%) | MAEP of fine-tuning of cross-domain model (wt.%) | MAEP of HTr-LIBS (wt.%) |
|---------------------------------|--------------------------------|---------------------------------------------------|--------------------------------------------------|-------------------------|
| 2                               | 12.2574                        | 8.2785                                            | 6.3143                                           | 4.5663                  |
| 3                               | 7.2387                         | 6.8265                                            | 5.2255                                           | 4.4279                  |
| 4                               | 7.3288                         | 5.3523                                            | 4.4332                                           | 3.5759                  |
| 5                               | 5.7140                         | 5.2975                                            | 3.3819                                           | 3.4131                  |

---

|    |        |        |        |        |
|----|--------|--------|--------|--------|
| 6  | 4.8847 | 3.8101 | 3.1876 | 2.9200 |
| 7  | 3.9298 | 5.4331 | 2.7645 | 2.7385 |
| 8  | 3.6163 | 3.7928 | 2.5723 | 2.6024 |
| 9  | 3.0248 | 3.4494 | 2.2100 | 2.2230 |
| 10 | 3.7598 | 4.2633 | 2.6150 | 2.5431 |
| 11 | 3.0159 | 4.3499 | 2.4389 | 2.4964 |
| 12 | 3.1259 | 3.5035 | 2.2926 | 2.2323 |
| 13 | 2.8346 | 4.5369 | 2.3854 | 1.8737 |
| 14 | 2.3987 | 2.9130 | 2.3453 | 2.1045 |
| 15 | 2.2715 | 2.3116 | 2.0866 | 1.8142 |
| 16 | 1.9201 | 2.8494 | 1.7528 | 1.6016 |
| 17 | 1.6381 | 1.9266 | 1.5877 | 1.4941 |
| 18 | 1.5345 | 1.1988 | 1.3317 | 1.3428 |
| 19 | 1.4626 | 1.2115 | 1.3822 | 1.2224 |

---
